# Supplementary material for: Ferroelectric-like switching in the nematic phase of four-ring bent-core liquid crystals
Source: Royal Society of Chemistry journal article supplement (doi:10.1039/c3tc31800a), 2013-10-23
Supplement: c3tc31800a.pdf [file c3tc31800a.pdf]

## Ferroelectric-like switching in the nematic phase of four-ring bent-core liquid crystals

Sharmistha Ghosh<sup>\*1</sup>, Nazma Begum<sup>2</sup>, Srikanth Turlapati<sup>2</sup>, Subir Kr. Roy<sup>1</sup>, Abhijit. Kr. Das<sup>1</sup> Nandiraju V.S. Rao<sup>2</sup>.

<sup>1</sup>Department of Spectroscopy, Indian Association for the Cultivation of Science, Jadavpur, Kolkata 700032, India.

<sup>2</sup>Chemistry Department, Assam University, Silchar, India.

### Electronic supporting information

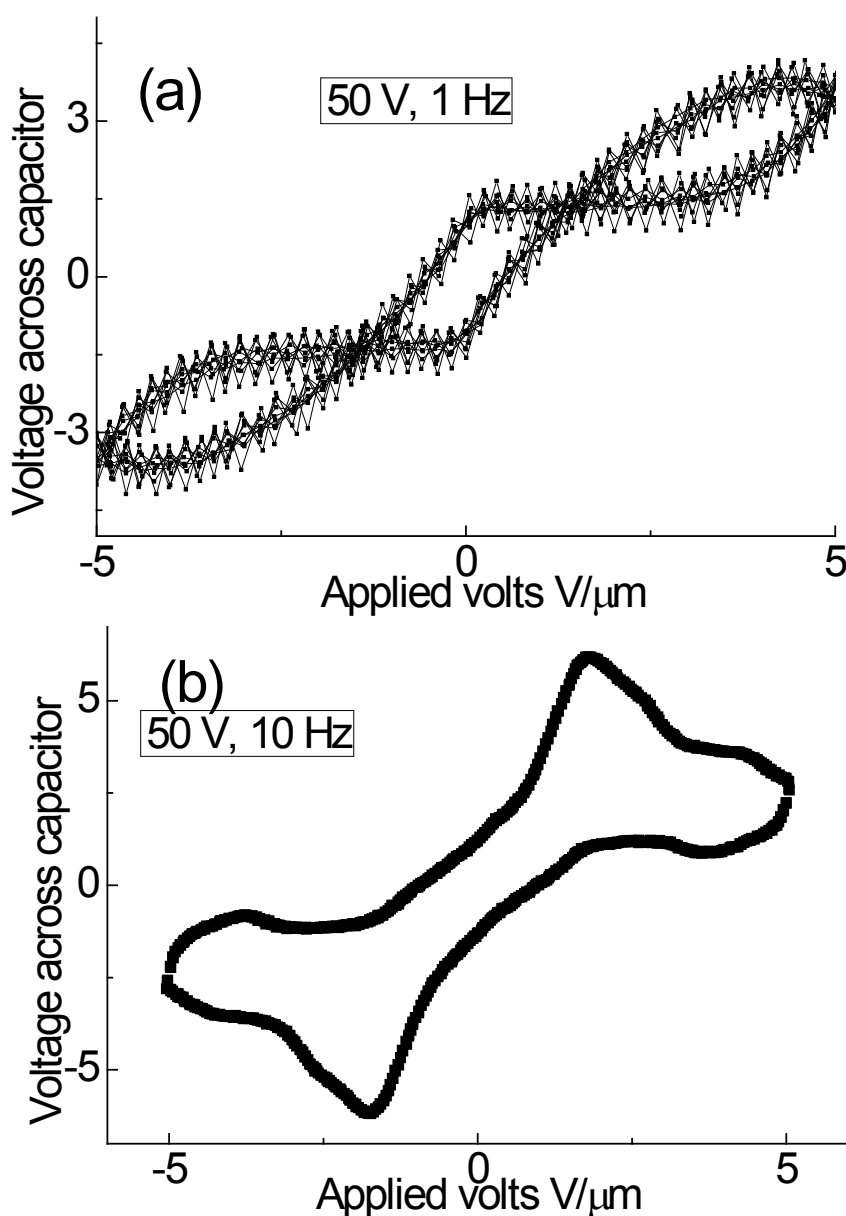

Figure S1: Hysteresis loops of **6-F** at two different frequencies (a) at 1Hz and (b) 10Hz.
